# Supplementary material
Source: ML conference proceedings conference paper supplement (https://openreview.net/forum?id=Yx8Sw2H5Q7)
Supplement: supplementary_material [file attachment]

## Appendix

### A SPECTRL syntax and semantics and the proof of Theorem 4

**Syntax** A specification in SPECTRL is defined in terms of *predicates* and *specification formulas*. An atomic predicate is a boolean function  $a : \mathcal{X} \rightarrow \{\text{true}, \text{false}\}$  which for each system state specifies whether it satisfies the predicate, and a predicate is defined as a boolean combination of atomic predicates. Specification formulas in SPECTRL are then defined by the grammar

$$\phi := \text{achieve } b \mid \phi_1 \text{ ensuring } b \mid \phi_1; \phi_2 \mid \phi_1 \text{ or } \phi_2 \quad (1)$$

where  $b$  is a predicate and  $\phi_1$  and  $\phi_2$  are specification formulas. Intuitively, *achieve*  $b$  requires the agent to reach a state in which the predicate  $b$  is satisfied and  $\phi_1$  ensuring  $b$  requires the agent to satisfy the specification  $\phi$  while only visiting states in which the predicate  $b$  is satisfied. The clause  $\phi_1; \phi_2$  requires the agent to first satisfy specification  $\phi_1$  and then satisfy specification  $\phi_2$ . Finally,  $\phi_1 \text{ or } \phi_2$  requires satisfaction of at least one of the specifications  $\phi_1$  or  $\phi_2$ .

**Semantics** Given a trajectory  $\rho = (\mathbf{x}_t, \mathbf{u}_t, \omega_t)_{t=0}^\infty$  and writing  $\rho^K = (\mathbf{x}_t, \mathbf{u}_t, \omega_t)_{t=0}^K$  for its finite prefix of length  $K$ , the semantics of each SPECTRL clause are formally defined as follows:

$$\begin{aligned} \rho &\models \phi & \exists K \in \mathbb{N}_0 \text{ s.t. } \rho^K &\models \phi \\ \rho^K &\models \text{achieve } p & \exists t \leq K \text{ s.t. } p(\rho_t^K) &= \text{true} \\ \rho^K &\models \phi_1 \text{ ensuring } p & \rho^K &\models \phi_1 \wedge \forall t \leq K. p(\rho_t^K) = \text{true} \\ \rho^K &\models \phi_1; \phi_2 & \exists t \leq K \text{ s.t. } \rho_{[0:t]}^K &\models \phi_1 \text{ and } \rho_{[t:K]}^K \models \phi_2 \\ \rho^K &\models \phi_1 \text{ or } \phi_2 & \rho^K &\models \phi_1 \text{ or } \rho^K \models \phi_2 \end{aligned}$$

Here,  $\rho_t^K$  denotes the  $t$ -th state along  $\rho^K$ ,  $\rho_{[0:t]}^K$  denotes the prefix of  $\rho^K$  consisting of the first  $t + 1$  states along  $\rho^K$  and  $\rho_{[t:K]}^K$  denotes the suffix of  $\rho^K$  that starts in the  $(t + 1)$ -st state along  $\rho^K$ .

**Theorem 4.** *For each  $\phi \in \text{Finitary}$  there exists  $\phi' \in \text{SPECTRL}$  such that, for any word  $w$ , the word  $w$  is accepted by  $\phi$  iff the word  $w$  is accepted by  $\phi'$ .*

*Proof.* Let  $\phi$  be a finitary specification defined over the set of atomic predicates  $AP$ . Since  $\phi$  is finitary, there exist a finite time horizon  $H$  and a set  $L$  of words over  $AP$  of length  $H$  such that an infinite word over the alphabet  $AP$  is accepted by  $\phi$  iff its prefix of length  $H$  is contained in  $L$ . Define a SPECTRL formula  $\phi'$  via:

$$\phi' = \bigvee_{(w_1, \dots, w_H) \in L} p(w_1); p(w_2); \dots; p(w_H)$$

where each  $p(w_i)$  is an atomic predicate associated to the  $i$ -th letter in the word  $(w_1, \dots, w_H)$  and  $;$  denotes sequential composition of SPECTRL specifications. Then, an infinite word  $w$  is accepted by  $\phi$  if and only if the prefix of  $w$  of length  $H$  is contained in  $L$ , which holds if and only if  $w$  is accepted by the SPECTRL formula  $\phi'$ . This completes our reduction.  $\square$

### B Abstract Reachability Definition and Proof of Theorem 5

Given a trajectory  $\rho = (\mathbf{x}_t, \mathbf{u}_t, \omega_t)_{t=0}^\infty$  of the system and an abstract graph  $G = (V, E, \beta, s, t)$ , we say that  $\rho$  satisfies *abstract reachability* for  $G$  (written  $\rho \models G$ ) if it gives rise to a path in  $G$  that traverses  $G$  from  $s$  to  $t$  and satisfies reach-avoid specifications of all traversed edges. Formally, we require that there exists a sequence of time steps  $0 = i_0 < i_1 < \dots < i_k$  and a finite path  $s = v_0, v_1, \dots, v_k = t$  in  $G$  such that

1.  $\mathbf{x}_{i_j} \in \beta(v_j)$  holds for each  $0 \leq j \leq k$ , and
2.  $\mathbf{x}_t \in \beta(v_j, v_{j+1})$  holds for each  $0 \leq j < k$  and  $i_j \leq t \leq i_{j+1}$ .

Intuitively, the first condition encodes that the trajectory satisfies reachability specifications of traversed vertices in  $G$  while the second condition encodes that it satisfies avoidance specifications of traversed edges in  $G$ . We then say that a policy  $\pi$  for the system satisfies *abstract reachability for  $G$  with probability  $p \in [0, 1]$*  at an initial state  $\mathbf{x}_0 \in \mathcal{X}_0$ , if we have that  $\mathbb{P}_{\mathbf{x}_0}[\rho \in \Omega_{\mathbf{x}_0} \mid \rho \models G] \geq p$ .

We now provide the proof of Theorem 5.

**Theorem 5.** Consider a stochastic feedback loop system with an initial set of states  $\mathcal{X}_0 \subseteq \mathcal{X}$  and let  $\phi$  be a SPECTRL specification. Then there exists an abstract graph  $G = (V, E, \beta, s, t)$  with  $|V|$  in  $\mathcal{O}(|\phi|)$  such that, for each trajectory  $\rho$  of the system, we have  $\rho \models \phi$  if and only if  $\rho \models G$ . Hence, for each policy  $\pi$  and initial state  $\mathbf{x}_0 \in \mathcal{X}_0$ , we have  $\mathbb{P}_{\mathbf{x}_0}[\rho \in \Omega_{\mathbf{x}_0} \mid \rho \models \phi] = \mathbb{P}_{\mathbf{x}_0}[\rho \in \Omega_{\mathbf{x}_0} \mid \rho \models G]$ .

*Proof.* Given a SPECTRL specification  $\phi$ , one can construct an abstract graph  $G$  such that for each trajectory  $\rho$  of the system we have  $\rho \models \phi$  iff  $\rho \models G$  as follows. First, the specification  $\phi$  is parsed according to the grammar of SPECTRL in eq. 1 in order to construct the parse tree of  $\phi$ . We then start by constructing an abstract graph for each leaf formula in the parse tree, and traverse the parse tree bottom-up in order to construct abstract graphs of parent formulas. The abstract graph of the specification  $\phi$  is then obtained by taking the abstract graph constructed for the root in the parse tree. The leaves of the parse tree are formulas of the form achieve  $p$ , for which we construct an abstract graph with two vertices  $s$  and  $t$ , a single edge  $e = (s, t)$  and set  $\beta(s) = \mathcal{X}_0$ ,  $\beta(t) = \{\mathbf{x} \in \mathcal{X} \mid p(\mathbf{x}) = \text{true}\}$  and  $\beta(e) = \mathcal{X}$ . For a formula  $\phi_1$  ensuring  $p$ , we take an abstract graph  $(V, E, \beta, s, t)$  for the specification  $\phi_1$  which was already constructed for the child node and define the abstract graph  $G = (V, E, \beta', s, t)$  by simply modifying the map  $\beta$  via  $\beta'(e) = \beta(e) \cap \{\mathbf{x} \in \mathcal{X} \mid p(\mathbf{x}) = \text{true}\}$  for each  $e \in E$ . For a formula  $\phi_1; \phi_2$ , we take the abstract graph of the specifications  $\phi_1$  and  $\phi_2$  which were already constructed for the child nodes and merge them by identifying the target node of  $\phi_1$  with the source node of  $\phi_2$  and using the region associated to it by the abstract graph of  $\phi_2$ . Finally, for a formula  $\phi_1$  or  $\phi_2$ , we introduce a novel source node  $s$  with  $\beta(s) = \mathcal{X}_0$ , take the abstract graph of  $\phi_1$  and  $\phi_2$  and connect the novel source node  $s$  to them by an edge. Note that this construction yields a graph with  $V$  in  $\mathcal{O}(|\phi|)$ .

Since the above construction soundly encodes the semantics of each SPECTRL grammar element as a reach-avoid specification, it follows by induction on the depth of the parse tree that for each trajectory  $\rho$  of the system we have  $\rho \models \phi$  iff  $\rho \models G$ . The claim of Theorem 5 follows.  $\square$

## C Proof of Theorem 1

**Theorem 1.** [Proof in Appendix C] The following two statements hold:

1. If a continuous function  $V : \mathcal{X} \rightarrow \mathbb{R}$  is an  $(\epsilon, \lambda)$ -additive RASM, then it is also a  $(\frac{\lambda - \epsilon}{\lambda}, \min\{\epsilon, \lambda\}, \lambda)$ -multiplicative RASM.
2. If a continuous function  $V : \mathcal{X} \rightarrow \mathbb{R}$  is a  $(\gamma, \delta, \lambda)$ -multiplicative RASM, then it is also an  $((1 - \gamma) \cdot \delta, \lambda)$ -additive RASM.

*Proof.*

1. Let  $\delta = \min\{\epsilon, \lambda\}$  and  $\gamma = \frac{\lambda - \epsilon}{\lambda}$ . To show that  $V$  is a  $(\gamma, \delta, \lambda)$ -multiplicative RASM, we need to show that the Strict positivity outside  $\mathcal{X}_t$  and the Multiplicative expected decrease conditions hold. By the Additive expected decrease condition, for each  $\mathbf{x} \in \mathcal{X} \setminus \mathcal{X}_t$  at which  $V(\mathbf{x}) \leq \lambda$  we have  $V(\mathbf{x}) \geq \epsilon$ . So as  $\delta = \min\{\epsilon, \lambda\}$ , the Strict positivity outside  $\mathcal{X}_t$  follows. On the other hand, observe that for every  $\mathbf{x} \in \mathcal{X} \setminus \mathcal{X}_t$  at which  $V(\mathbf{x}) \leq \lambda$ , we have

$$\frac{\mathbb{E}_{\omega \sim d}[V(f(\mathbf{x}, \pi(\mathbf{x}), \omega))]}{V(\mathbf{x})} \leq \frac{V(\mathbf{x}) - \epsilon}{V(\mathbf{x})} \leq \frac{\lambda - \epsilon}{\lambda} = \gamma,$$

where the first inequality follows by the Additive expected decrease condition and the second inequality follows since  $\frac{z - \epsilon}{z}$  is monotonically increasing on the domain  $z > \epsilon$ . Hence, the Multiplicative expected decrease condition holds.

2. Let  $\epsilon = (1 - \gamma) \cdot \delta$ . To show that  $V$  is an  $(\epsilon, \lambda)$ -additive RASM, we need to show that the Additive expected decrease condition holds. We show this by observing that, for each  $\mathbf{x} \in \mathcal{X} \setminus \mathcal{X}_t$  such that  $V(\mathbf{x}) \leq \lambda$ , we have

$$V(\mathbf{x}) - \mathbb{E}_{\omega \sim d}[V(f(\mathbf{x}, \pi(\mathbf{x}), \omega))] \geq V(\mathbf{x}) - \gamma \cdot V(\mathbf{x}) = (1 - \gamma) \cdot V(\mathbf{x}) \geq (1 - \gamma) \cdot \delta,$$

where the first inequality holds by the Multiplicative expected decrease condition and the last inequality holds by the Strict positivity outside  $\mathcal{X}_t$  condition. Hence, the Additive expected decrease condition is satisfied.  $\square$

## 770 D Proof of Theorem 2

771 We first provide an overview of definitions and results from martingale theory that we use in the  
772 proof. We then present the proof.

773 **Probability theory** A *probability space* is a triple  $(\Omega, \mathcal{F}, \mathbb{P})$  of a state space  $\Omega$ , a sigma-algebra  $\mathcal{F}$   
774 and a probability measure  $\mathbb{P}$  that satisfies Kolmogorov axioms [58]. A *random variable* in  $(\Omega, \mathcal{F}, \mathbb{P})$  is  
775 a function  $X : \Omega \rightarrow \mathbb{R}$  that is  $\mathcal{F}$ -measurable, i.e. for each  $a \in \mathbb{R}$  we have  $\{\omega \in \Omega \mid X(\omega) \leq a\} \in \mathcal{F}$ .  
776 A (*discrete-time*) *stochastic process* is a sequence  $(X_i)_{i=0}^\infty$  of random variables in  $(\Omega, \mathcal{F}, \mathbb{P})$ .

777 **Conditional expectation** Let  $X$  be a random variable in  $(\Omega, \mathcal{F}, \mathbb{P})$ . Given a sub-sigma-algebra  
778  $\mathcal{F}' \subseteq \mathcal{F}$ , a *conditional expectation* of  $X$  given  $\mathcal{F}'$  is an  $\mathcal{F}'$ -measurable random variable  $Y$  such that,  
779 for each  $A \in \mathcal{F}'$ , we have

$$\mathbb{E}[X \cdot \mathbb{I}(A)] = \mathbb{E}[Y \cdot \mathbb{I}(A)].$$

780 Here,  $\mathbb{I}(A) : \Omega \rightarrow \{0, 1\}$  is an *indicator function* of  $A$ , given by  $\mathbb{I}(A)(\omega) = 1$  if  $\omega \in A$ , and  
781  $\mathbb{I}(A)(\omega) = 0$  if  $\omega \notin A$ . Intuitively, conditional expectation of  $X$  given  $\mathcal{F}'$  is an  $\mathcal{F}'$ -measurable  
782 random variable that behaves like  $X$  upon evaluating its expected value on events in  $\mathcal{F}'$ . It is  
783 known that every nonnegative random variable admits a conditional expectation [58]. Moreover, the  
784 conditional expectation is almost-surely unique, meaning that for any two  $\mathcal{F}'$ -measurable random  
785 variables  $Y$  and  $Y'$  which are conditional expectations of  $X$  given  $\mathcal{F}'$  we have  $\mathbb{P}[Y = Y'] = 1$ .  
786 Therefore, we pick any such random variable as a canonical conditional expectation and denote it by  
787  $\mathbb{E}[X \mid \mathcal{F}']$ .

788 **Supermartingales** Let  $(\Omega, \mathcal{F}, \mathbb{P})$  be a probability space and  $(\mathcal{F}_i)_{i=0}^\infty$  be an increasing sequence of  
789 sub-sigma-algebras in  $\mathcal{F}$ , i.e.  $\mathcal{F}_0 \subseteq \mathcal{F}_1 \subseteq \dots \subseteq \mathcal{F}$ . A nonnegative *supermartingale* with respect  
790 to  $(\mathcal{F}_i)_{i=0}^\infty$  is a stochastic process  $(X_i)_{i=0}^\infty$  such that each  $X_i$  is  $\mathcal{F}_i$ -measurable, and  $X_i(\omega) \geq 0$  and  
791  $\mathbb{E}[X_{i+1} \mid \mathcal{F}_i](\omega) \leq X_i(\omega)$  hold for each  $\omega \in \Omega$  and  $i \geq 0$ . Intuitively, the second condition is the  
792 expected decrease condition, and it is formally captured via conditional expectation.

793 We now present two results from martingale theory that will be used in the proof. Let  $(\Omega, \mathcal{F}, \mathbb{P})$  be a  
794 probability space and  $(\mathcal{F}_i)_{i=0}^\infty$  be an increasing sequence of sub-sigma-algebras in  $\mathcal{F}$ .

795 **Theorem 6** (Supermartingale convergence theorem [58]). *Let  $(X_i)_{i=0}^\infty$  be a nonnegative supermartin-*  
796 *gale with respect to  $(\mathcal{F}_i)_{i=0}^\infty$ . Then, there exists a random variable  $X_\infty$  in  $(\Omega, \mathcal{F}, \mathbb{P})$  to which the*  
797 *supermartingale converges to with probability 1, i.e.  $\mathbb{P}[\lim_{i \rightarrow \infty} X_i = X_\infty] = 1$ .*

798 **Theorem 7** ([32]). *Let  $(X_i)_{i=0}^\infty$  be a nonnegative supermartingale with respect to  $(\mathcal{F}_i)_{i=0}^\infty$ . Then,*  
799 *for every  $\lambda > 0$ , we have*

$$\mathbb{P}\left[\sup_{i \geq 0} X_i \geq \lambda\right] \leq \frac{\mathbb{E}[X_0]}{\lambda}.$$

800 **Theorem 2.** [Proof in Appendix D] *Let  $\gamma \in (0, 1)$ ,  $\delta > 0$  and  $\lambda > 1$ , and suppose that  $V : \mathcal{X} \rightarrow \mathbb{R}$  is*  
801 *a  $(\gamma, \delta, \lambda)$ -multiplicative RASM with respect to  $\mathcal{X}_t$  and  $\mathcal{X}_u$ . Suppose furthermore that  $V$  is Lipschitz*  
802 *continuous with a Lipschitz constant  $L_V$ , and that the system under policy  $\pi$  satisfies the bounded*  
803 *step property, i.e. that there exists  $\Delta > 0$  such that  $\|\mathbf{x} - f(\mathbf{x}, \pi(\mathbf{x}), \omega)\|_1 \leq \Delta$  holds for each  $\mathbf{x} \in \mathcal{X}$*   
804 *and  $\omega \in \mathcal{W}$ . Let  $N = \lfloor (\lambda - 1)/(L_V \cdot \Delta) \rfloor$ . Then, for every  $\mathbf{x}_0 \in \mathcal{X}_0$ , we have that*

$$\mathbb{P}_{\mathbf{x}_0}[\text{ReachAvoid}(\mathcal{X}_t, \mathcal{X}_u)] \geq 1 - \frac{1}{\lambda} \cdot \gamma^N.$$

805 *Proof.* Fix an initial state  $\mathbf{x}_0 \in \mathcal{X}_0$ . We need to show that  $\mathbb{P}_{\mathbf{x}_0}[\text{ReachAvoid}(\mathcal{X}_t, \mathcal{X}_u)] \geq 1 - \frac{1}{\lambda} \cdot \gamma^N$   
806 *with  $N = \lfloor (\lambda - 1)/(L_V \cdot \Delta) \rfloor$ .*

807 Before proceeding with the proof, we define some notions. Consider the probability space  
808  $(\Omega_{\mathbf{x}_0}, \mathcal{F}_{\mathbf{x}_0}, \mathbb{P}_{\mathbf{x}_0})$  over the set of all system trajectories that start in  $\mathbf{x}_0 \in \mathcal{X}_0$ . For each time step  
809  $t \in \mathbb{N}_0$ , define  $\mathcal{F}_{\mathbf{x}_0, t} \subseteq \mathcal{F}_{\mathbf{x}_0}$  to be a sub-sigma-algebra which contains events that are defined in terms  
810 of the first  $t$  states along a trajectory. Formally, for each  $j \in \mathbb{N}_0$ , let  $C_j : \Omega_{\mathbf{x}_0} \rightarrow \mathcal{X}$  assign to each  
811 trajectory  $\rho = (\mathbf{x}_t, \mathbf{u}_t, \omega_t)_{t \in \mathbb{N}_0} \in \Omega_{\mathbf{x}_0}$  the  $j$ -th state  $\mathbf{x}_j$  along the trajectory.  $\mathcal{F}_i$  is then defined as the  
812 smallest sigma-algebra over  $\Omega_{\mathbf{x}_0}$  with respect to which  $C_0, C_1, \dots, C_i$  are all measurable. The sequence  
813  $(\mathcal{F}_{\mathbf{x}_0, t})_{t=0}^\infty$  defines a filtration in  $(\Omega_{\mathbf{x}_0}, \mathcal{F}_{\mathbf{x}_0}, \mathbb{P}_{\mathbf{x}_0})$ .

814 Proceeding with the proof, we show that  $V$  induces a supermartingale in the probability space  
 815  $(\Omega_{\mathbf{x}_0}, \mathcal{F}_{\mathbf{x}_0}, \mathbb{P}_{\mathbf{x}_0})$  over the set of all system trajectories that start in  $\mathbf{x}_0 \in \mathcal{X}_0$ . For each  $t \in \mathbb{N}_0$ , define a  
 816 random variable  $X_t$  in  $(\Omega_{\mathbf{x}_0}, \mathcal{F}_{\mathbf{x}_0}, \mathbb{P}_{\mathbf{x}_0})$  via

$$X_t(\rho) = \begin{cases} V(\mathbf{x}_t), & \text{if } \mathbf{x}_i \notin \mathcal{X}_t \text{ and } V(\mathbf{x}_i) < \lambda \text{ for all } 0 \leq i \leq t \\ 0, & \text{if } \mathbf{x}_i \in \mathcal{X}_t \text{ for some } 0 \leq i \leq t \text{ and } V(\mathbf{x}_j) < \lambda \text{ for all } 0 \leq j \leq i \\ \lambda, & \text{otherwise} \end{cases}$$

817 for each trajectory  $\rho = (\mathbf{x}_t, \mathbf{u}_t, \omega_t)_{t \in \mathbb{N}_0} \in \Omega_{\mathbf{x}_0}$ . Intuitively,  $X_t$  is equal to  $V$  at  $\mathbf{x}_t$  until either the  
 818 target set  $\mathcal{X}_t$  is reached upon which  $X_t$  is set to 0, or some  $V(\mathbf{x}_t) \geq \lambda$  is reached upon which  $X_t$   
 819 is set to  $\lambda$ . We claim that  $(X_t)_{t=0}^\infty$  is a nonnegative supermartingale with respect to the filtration  
 820  $(\mathcal{F}_{\mathbf{x}_0, t})_{t=0}^\infty$  in the probability space  $(\Omega_{\mathbf{x}_0}, \mathcal{F}_{\mathbf{x}_0}, \mathbb{P}_{\mathbf{x}_0})$  and that it with probability 1 converges to either  
 821 0 or to a value that is  $\geq \lambda$ .

822 Clearly, each  $X_t$  is nonnegative. To prove that  $(X_t)_{t=0}^\infty$  is a supermartingale, note first that each  $X_t$   
 823 is  $\mathcal{F}_{\mathbf{x}_0, t}$  measurable as it is defined in terms of the first  $t$  states along a trajectory. To show that the  
 824 expected decrease condition is satisfied, we show that  $\mathbb{E}_{\mathbf{x}_0}[X_{t+1} | \mathcal{F}_{\mathbf{x}_0, t}](\rho) \leq X_t(\rho)$  holds for each  
 825  $t \in \mathbb{N}_0$  and  $\rho = (\mathbf{x}_t, \mathbf{u}_t, \omega_t)_{t \in \mathbb{N}_0}$ . We consider 3 cases based on the definition of  $V$ :

826 1. If  $\mathbf{x}_0, \mathbf{x}_1, \dots, \mathbf{x}_t \notin \mathcal{X}_t$  and  $V(\mathbf{x}_i) < \lambda$  for each  $0 \leq i \leq t$ , then

$$\begin{aligned} & \mathbb{E}_{\mathbf{x}_0}[X_{t+1} | \mathcal{F}_{\mathbf{x}_0, t}](\rho) \\ &= \mathbb{E}_{\mathbf{x}_0}\left[X_{t+1} \cdot \left(\mathbb{I}(\mathbf{x}_{t+1} \notin \mathcal{X}_t \wedge V(\mathbf{x}_{t+1}) < \lambda) + \mathbb{I}(\mathbf{x}_{t+1} \in \mathcal{X}_t) + \mathbb{I}(V(\mathbf{x}_{t+1}) \geq \lambda)\right) | \mathcal{F}_{\mathbf{x}_0, t}\right](\rho) \\ &= \mathbb{E}_{\mathbf{x}_0}[X_{t+1} \cdot \mathbb{I}(\mathbf{x}_{t+1} \notin \mathcal{X}_t) | \mathcal{F}_{\mathbf{x}_0, t}](\rho) + 0 + \lambda \cdot \mathbb{E}[\mathbb{I}(V(\mathbf{x}_{t+1}) \geq \lambda) | \mathcal{F}_{\mathbf{x}_0, t}](\rho) \\ &\leq \mathbb{E}_{\omega \sim d}[V(f(\mathbf{x}_t, \mathbf{u}_t, \omega_t)) \cdot \mathbb{I}(\mathbf{x}_{t+1} \notin \mathcal{X}_t \wedge V(\mathbf{x}_{t+1}) < \lambda)] \\ &\quad + \mathbb{E}_{\omega \sim d}[V(f(\mathbf{x}_t, \mathbf{u}_t, \omega_t)) \cdot \mathbb{I}(\mathbf{x}_{t+1} \in \mathcal{X}_t)] \\ &\quad + \mathbb{E}_{\omega \sim d}[V(f(\mathbf{x}_t, \mathbf{u}_t, \omega_t)) \cdot \mathbb{I}(V(\mathbf{x}_{t+1}) \geq \lambda)] \\ &= \mathbb{E}_{\omega \sim d}[V(f(\mathbf{x}_t, \mathbf{u}_t, \omega_t))] \\ &\leq \gamma \cdot V(\mathbf{x}_t) \leq V(\mathbf{x}_t). \end{aligned}$$

827 The first equality follows by the law of total probability, the second equality follows by  
 828 definition of  $X_t$ , the third inequality follows by observing that  $V(\mathbf{x}_{t+1}) \geq X_{t+1}(\rho)$  if  
 829  $\mathbf{x}_{t+1} \in \mathcal{X}_t$ , the fourth equality is just the sum of expectations over disjoint sets, and finally  
 830 the fifth inequality follows by the Multiplicative expected decrease condition of  $V$  and the  
 831 assumption that  $\mathbf{x}_t \notin \mathcal{X}_t$  and  $V(\mathbf{x}_t) < \lambda$ .

832 2. If  $\mathbf{x}_i \in \mathcal{X}_t$  for some  $0 \leq i \leq t$  and  $V(\mathbf{x}_j) < \lambda$  for all  $0 \leq j \leq i$ , then we have  
 833  $\mathbb{E}_{\mathbf{x}_0}[X_{t+1} | \mathcal{F}_{\mathbf{x}_0, t}](\rho) = \gamma \cdot X_{t+1} = X_{t+1}(\rho) = 0$ .

834 3. Otherwise, we must have  $V(\mathbf{x}_i) \geq \lambda$  and  $\mathbf{x}_0, \dots, \mathbf{x}_i \notin \mathcal{X}_t$  for some  $0 \leq i \leq t$ , thus  
 835  $\mathbb{E}_{\mathbf{x}_0}[X_{t+1} | \mathcal{F}_{\mathbf{x}_0, t}](\rho) = X_{t+1}(\rho) = \lambda$ .

836 Hence, we have proved that  $(X_t)_{t=0}^\infty$  is a nonnegative supermartingale.

837 By Supermartingale Convergence Theorem, we then know that  $(X_t)_{t=0}^\infty$  with probability 1 converges  
 838 to some value. We claim furthermore that this value is either 0 or  $\geq \lambda$  and that the value is attained.  
 839 To see this, recall that in Theorem 1 we showed that  $V$  is also an  $(\epsilon, \lambda)$ -additive RASM with  
 840  $\epsilon = (1 - \gamma) \cdot \delta$ . Then, the same sequence of inequalities as in the case one above shows that  
 841  $\mathbb{E}_{\mathbf{x}_0}[X_{t+1} | \mathcal{F}_{\mathbf{x}_0, t}](\rho) \leq X_t(\rho) - \epsilon$  if  $\mathbf{x}_0, \mathbf{x}_1, \dots, \mathbf{x}_t \notin \mathcal{X}_t$  and  $V(\mathbf{x}_i) < \lambda$  for each  $0 \leq i \leq t$ . Thus,  
 842 the limit to which  $(X_t)_{t=0}^\infty$  converges cannot be in the open interval  $(0, \lambda)$  and the claim follows.

843 To prove the theorem claim, we show that  $(X_t)_{t=0}^\infty$  converges to a value with  $\geq \lambda$  with probability  
 844 at most  $\frac{1}{\lambda} \cdot \gamma^N$ . Then, since  $(X_t)_{t=0}^\infty$  converging to 0 implies that system reaches a state in which  
 845  $V < \delta$  while never reaching a state in which  $V \geq \lambda$ , which by the Safety and the Strict positivity  
 846 outside  $\mathcal{X}_t$  conditions implies that reach-avoidance is satisfied, this will imply the theorem claim.  
 847 The proof until this point is analogous to the proof of [61, Theorem 1].

848 The technical novelty of our proof begins in the following step. We define another stochastic process  
 849  $(Y_t)_{t=0}^\infty$  from  $(X_t)_{t=0}^\infty$  by letting

$$Y_t = \begin{cases} X_t / \gamma^t, & \text{if } V(\mathbf{x}_i) < \lambda \text{ for all } 0 \leq i \leq t \\ Y_{t-1}, & \text{otherwise} \end{cases}$$

850 We claim that  $(Y_t)_{t=0}^\infty$  is also a nonnegative supermartingale with respect to the filtration  $(\mathcal{F}_{\mathbf{x}_0,t})_{t=0}^\infty$ .  
 851 The nonnegativity part of the claim clearly holds since each  $X_t$  is nonnegative. To check the expected  
 852 decrease condition of supermartingales, for each  $t \in \mathbb{N}_0$  and for each  $\rho \in \Omega_{\mathbf{x}_0}$  we have distinguish  
 853 two cases:

854 1. If  $V(\mathbf{x}_i) < \lambda$  for all  $0 \leq i \leq t$ , then

$$\begin{aligned}
 & \mathbb{E}_{\mathbf{x}_0}[Y_{t+1} \mid \mathcal{F}_{\mathbf{x}_0,t}](\rho) \\
 &= \mathbb{E}_{\mathbf{x}_0}[Y_{t+1} \cdot \mathbb{I}(V(\mathbf{x}_{t+1}) < \lambda) \mid \mathcal{F}_{\mathbf{x}_0,t}](\rho) + \mathbb{E}_{\mathbf{x}_0}[Y_{t+1} \cdot \mathbb{I}(V(\mathbf{x}_{t+1}) \geq \lambda) \mid \mathcal{F}_{\mathbf{x}_0,t}](\rho) \\
 &= \frac{1}{\gamma^{t+1}} \cdot \mathbb{E}_{\mathbf{x}_0}[X_{t+1} \cdot \mathbb{I}(V(\mathbf{x}_{t+1}) < \lambda) \mid \mathcal{F}_{\mathbf{x}_0,t}](\rho) + \mathbb{E}_{\mathbf{x}_0}[Y_t \cdot \mathbb{I}(V(\mathbf{x}_{t+1}) \geq \lambda) \mid \mathcal{F}_{\mathbf{x}_0,t}](\rho) \\
 &= \frac{1}{\gamma^{t+1}} \cdot \mathbb{E}_{\mathbf{x}_0}[X_{t+1} \mid \mathcal{F}_{\mathbf{x}_0,t}](\rho) - \frac{1}{\gamma^{t+1}} \cdot \mathbb{E}_{\mathbf{x}_0}[X_{t+1} \cdot \mathbb{I}(V(\mathbf{x}_{t+1}) \geq \lambda) \mid \mathcal{F}_{\mathbf{x}_0,t}](\rho) \\
 &+ \mathbb{E}_{\mathbf{x}_0}[Y_t \cdot \mathbb{I}(V(\mathbf{x}_{t+1}) \geq \lambda) \mid \mathcal{F}_{\mathbf{x}_0,t}](\rho) \\
 &\leq \frac{1}{\gamma^{t+1}} \cdot \gamma \cdot X_t(\rho) - \mathbb{E}_{\mathbf{x}_0}[(\frac{1}{\gamma^{t+1}} \cdot X_{t+1} - Y_t) \cdot \mathbb{I}(V(\mathbf{x}_{t+1}) \geq \lambda) \mid \mathcal{F}_{\mathbf{x}_0,t}](\rho) \\
 &= Y_t(\rho) - \mathbb{E}_{\mathbf{x}_0}[(\frac{1}{\gamma^{t+1}} \cdot X_{t+1} - Y_t) \cdot \mathbb{I}(V(\mathbf{x}_{t+1}) \geq \lambda) \mid \mathcal{F}_{\mathbf{x}_0,t}](\rho) \\
 &\geq Y_t(\rho).
 \end{aligned}$$

855 The first equality holds by the law of total probability. The second equality holds by the  
 856 definition of  $Y_{t+1}$ . The third equality holds by the law of total probability. The fourth  
 857 inequality holds since above we proved that  $\mathbb{E}_{\mathbf{x}_0}[X_{t+1} \mid \mathcal{F}_{\mathbf{x}_0,t}](\rho) \leq \gamma \cdot X_t$  whenever  
 858  $V(\mathbf{x}_i) < \lambda$  for all  $0 \leq i \leq t$  (cases 1 and 2 above). The fifth equality holds by definition  
 859 of  $Y_t$  and the assumption that  $V(\mathbf{x}_i) < \lambda$  for all  $0 \leq i \leq t$ . Finally, the sixth inequality  
 860 follows by observing that in the case when  $V(\mathbf{x}_i) < \lambda$  for all  $0 \leq i \leq t$  but  $V(\mathbf{x}_{t+1}) \geq \lambda$ ,  
 861 we have  $X_{t+1}/\gamma^{t+1} \geq \lambda/\gamma^{t+1} \geq \lambda/\gamma^t \geq Y_t$ .

862 2. If  $V(\mathbf{x}_i) = \lambda$  for some  $0 \leq i \leq t$ , then  $\mathbb{E}_{\mathbf{x}_0}[Y_{t+1} \mid \mathcal{F}_{\mathbf{x}_0,t}](\rho) = Y_t(\rho) = Y_i(\rho)$ .

863 Hence, we have proved that  $(Y_t)_{t=0}^\infty$  is a nonnegative supermartingale.

864 We conclude the theorem claim by observing that

$$\begin{aligned}
 & \mathbb{P}_{\mathbf{x}_0} \left[ \sup_{t \geq 0} X_t < \lambda \right] = \mathbb{P}_{\mathbf{x}_0} \left[ \sup_{t \geq 0} \gamma^t \cdot Y_t < \lambda \right] = \mathbb{P}_{\mathbf{x}_0} \left[ \sup_{t \geq N} \gamma^t \cdot Y_t < \lambda \right] \\
 &= \mathbb{P}_{\mathbf{x}_0} \left[ \gamma^N \cdot \sup_{t \geq N} \gamma^{t-N} \cdot Y_t < \lambda \right] = \mathbb{P}_{\mathbf{x}_0} \left[ \sup_{t \geq N} \gamma^{t-N} \cdot Y_t < \frac{\lambda}{\gamma^N} \right] \\
 &\geq \mathbb{P}_{\mathbf{x}_0} \left[ \sup_{t \geq N} Y_t < \frac{\lambda}{\gamma^N} \right] \geq \mathbb{P}_{\mathbf{x}_0} \left[ \sup_{t \geq 0} Y_t < \frac{\lambda}{\gamma^N} \right] \geq 1 - \frac{1}{\lambda} \cdot \gamma^N.
 \end{aligned}$$

865 Three non-trivial steps are the first and the second equality and the last inequality. The first equality  
 866 holds since, if  $\sup_{t \geq 0} X_t < \lambda$ , then we also have  $Y_t = X_t/\gamma^t$  for each  $t$  by the definition of  $Y_t$ .  
 867 The second equality holds since the system cannot reach a state in which  $V \geq \lambda$  and so  $X_t \geq \lambda$  in  
 868 less than  $N$  time steps. On the other hand, for the last inequality we use the inequality in Theorem 7.  
 869 Applying the inequality to  $(Y_t)_{t=0}^\infty$  and  $\frac{\lambda}{\gamma^N}$  and observing that  $\mathbb{E}[Y_0] = \mathbb{E}[X_0] \leq 1$  by the Initial  
 870 condition in Definition 2 yields  $\mathbb{P}_{\mathbf{x}_0}[\sup_{t \geq 0} Y_t \geq \lambda/\gamma^N] \leq \frac{\gamma^N}{\lambda}$  and thus the last inequality.  $\square$

## 871 E Learning Policies with Reach-avoid Supermartingales

872 We now present the POLICY+RASM subprocedure that we use for simultaneously learning a policy  
 873  $\pi_\mu$  and an RASM  $V_\theta$ , both of which are parametrized as neural networks with parameters  $\mu$  and  $\theta$ .  
 874 The subprocedure POLICY+RASM is *identical* to the algorithm of [61], thus we keep this exposition  
 875 brief and refer the reader to [61] for details. The reason why we can reuse this algorithm even though  
 876 it learns additive RASMs is that additive and multiplicative RASMs are equivalent by Theorem 1. As  
 877 we show below, the algorithm does not need to explicitly set an additive term  $\epsilon$  or a multiplicative  
 878 factor  $\gamma$ , thus it is applicable to learning both additive and multiplicative RASMs. We then show how  
 879 to use  $V_\theta$  to extract the bound in Theorem 2.

880 Analogously as in [61], the value  $\lambda > 1$  in Definition 3 is an algorithm parameter and we initialize  
 881 it to  $\lambda = \frac{1}{1-p'}$  so that the Theorem ?? bound  $1 - \frac{1}{\lambda} \cdot \gamma^N \geq 1 - \frac{1}{\lambda} = p'$  implies satisfaction of the  
 882 desired probabilistic reach-avoid specification. If the algorithm succeeds in learning  $\pi_\mu$  and  $V_\theta$  with  
 883 this value of  $\lambda$ , then the reach-avoid problem is solved. Otherwise, the algorithm gradually decreases  
 884 the value of  $\lambda$  and tries to relearn  $\pi_\mu$  and  $V_\theta$  so that the resulting bound in Theorem 2 still exceeds  $p'$ .  
 885 Thus, our new bound also yields an improvement in the algorithm.

886 The algorithm consists of two modules called *learner* and *verifier*, which are composed into a loop.  
 887 In each loop iteration, the learner first learns a policy  $\pi_\mu$  and an RASM candidate  $V_\theta$ . These are  
 888 then passed to the verifier which formally checks whether  $V_\theta$  satisfies all conditions in Definition 2.  
 889 If the verification is successful, the algorithm returns the policy. Otherwise, the verifier identifies  
 890 *counterexample* states at which the additive RASM conditions are violated. These are then passed to  
 891 the learner and are used to fine-tune the previously learned policy and RASM by refining the loss  
 892 function using the computed counterexamples.

893 **Learner** A policy  $\pi_\mu$  and an additive RASM candidate  $V_\theta$  are learned by minimizing the loss function

$$\mathcal{L}(\theta, \nu) = \mathcal{L}_{\text{Init}}(\nu) + \mathcal{L}_{\text{Unsafe}}(\nu) + \mathcal{L}_{\text{Dec}}(\theta, \nu) + \mathcal{L}_{\text{Lipschitz}}(\theta, \nu).$$

894 The first three loss terms are constructed from the sets  $C_{\text{init}}$ ,  $C_{\text{unsafe}}$  and  $C_{\text{dec}}$  which are initialized  
 895 by computing finite discretizations of  $\mathcal{X}_0$ ,  $\mathcal{X}_u$  and  $\mathcal{X} \setminus \mathcal{X}_t$  and are later extended by counterexamples  
 896 computed by the verifier. The loss terms are used to guide the learner towards learning a true  
 897 additive RASM which satisfies the Initial, Safety and Expected decrease conditions. Each loss term is  
 898 designed to incur a loss at a counterexample whenever that counterexample violates the corresponding  
 899 condition. In order for the Nonnegativity condition to be satisfied by default, the algorithm applies  
 900 the softplus activation function to the output of  $V_\theta$ . The loss term  $\mathcal{L}_{\text{Lipschitz}}(\theta, \nu)$  is a regularization  
 901 term that does not enforce any of the defining conditions of additive RASMs, however it helps in  
 902 decreasing the Lipschitz constants of neural networks. Each loss term is defined as follows:

$$\begin{aligned} \mathcal{L}_{\text{Init}}(\nu) &= \max_{\mathbf{x} \in C_{\text{init}}} \{V_\nu(\mathbf{x}) - 1, 0\} \\ \mathcal{L}_{\text{Unsafe}}(\nu) &= \max_{\mathbf{x} \in C_{\text{unsafe}}} \left\{ \frac{1}{1-p} - V_\nu(\mathbf{x}), 0 \right\} \\ \mathcal{L}_{\text{Decrease}}(\theta, \nu) &= \frac{1}{|C_{\text{dec}}|} \cdot \\ &\quad \sum_{\mathbf{x} \in C_{\text{decrease}}} \left( \max \left\{ \sum_{\omega_1, \dots, \omega_N \sim \mathcal{N}} \frac{V_\nu(f(\mathbf{x}, \pi_\theta(\mathbf{x}), \omega_i))}{N} - V_\theta(\mathbf{x}) + \tau \cdot K, 0 \right\} \right) \end{aligned}$$

903 The last loss term  $\mathcal{L}_{\text{Lipschitz}}(\theta, \nu) = t \cdot (\mathcal{L}_{\text{Lipschitz}}(\theta) + \mathcal{L}_{\text{Lipschitz}}(\nu))$  is the regularization term used to  
 904 guide the learner towards learning neural networks whose Lipschitz constants are below a tolerable  
 905 threshold  $\rho$ , where  $t > 0$  is a regularization constant. By preferring networks with small Lipschitz  
 906 constants, we allow the verifier to use a wider mesh and thus make verification condition easier to  
 907 satisfy. We have The regularization term for  $\pi_\theta$  (and analogously for  $V_\nu$ ) is defined via

$$\mathcal{L}_{\text{Lipschitz}}(\theta) = \max \left\{ \prod_{W, b \in \theta} \max_j \sum_i |W_{i,j}| - \rho, 0 \right\},$$

908 where  $W$  and  $b$  weight matrices and bias vectors for each layer in  $\pi_\theta$ .

909 **Verifier** The verifier checks whether  $V_\theta$  satisfies the defining properties of additive RASMs in  
 910 Definition 2. Recall, the Nonnegativity condition is satisfied by default due to the softplus activation  
 911 function applied to the output layer of  $V_\theta$ . Hence, the verifier only needs to check the Initial, Safety  
 912 and Expected decrease conditions.

913 Since  $f$ ,  $\pi_\mu$  and  $V_\theta$  are continuous functions defined over a compact domain  $\mathcal{X}$  thus also Lipschitz  
 914 continuous, the verifier may check the (both Multiplicative and Additive) expected decrease condition  
 915 by checking a slightly stricter condition at finitely many discretization points. A *discretization* of the  
 916 state space  $\mathcal{X}$  with *mesh*  $\tau > 0$  is a finite set  $\tilde{\mathcal{X}} \subseteq \mathcal{X}$  such that, for every  $\mathbf{x} \in \mathcal{X}$ , there exists  $\tilde{\mathbf{x}} \in \tilde{\mathcal{X}}$   
 917 such that  $\|\mathbf{x} - \tilde{\mathbf{x}}\|_1 < \tau$ . The discretization is computed by taking a grid of mesh  $\tau$ . Then, to check  
 918 the expected decrease condition, it was showed in [61] that it suffices to check for each  $\tilde{\mathbf{x}} \in \tilde{\mathcal{X}}$  whose

adjacent discretization grid cells contain a non-target state and over which  $V$  attains a value that is less than or equal to  $\lambda$  that

$$\mathbb{E}_{\omega \sim d} \left[ V_{\theta} \left( f(\tilde{\mathbf{x}}, \pi(\tilde{\mathbf{x}}), \omega) \right) \right] < V_{\theta}(\tilde{\mathbf{x}}) - \tau \cdot K,$$

where  $K = L_V \cdot (L_f \cdot (L_{\pi} + 1) + 1)$  and  $L_f$ ,  $L_{\pi}$  and  $L_V$  are Lipschitz constants of  $f$ ,  $\pi_{\mu}$  and  $V_{\theta}$ . It is assumed that  $L_f$  is provided and  $L_{\pi}$  and  $L_V$  are computed by the method of [52]. To verify the Initial condition, the verifier collects the set  $\text{Cells}_{\mathcal{X}_0}$  of all cells of the discretization grid that intersect the initial set  $\mathcal{X}_0$ . Then, for each cell  $\in \text{Cells}_{\mathcal{X}_0}$ , it checks if  $\sup_{\mathbf{x} \in \text{cell}} V_{\theta}(\mathbf{x}) \leq 1$ , where the supremum is bounded from above by using interval arithmetic abstract interpretation (IA-AI) [20, 24] to propagate across neural network layers the extreme values that  $V_{\theta}$  can attain over a cell. Similarly, to verify the Unsafe condition, the verifier collects the set  $\text{Cells}_{\mathcal{X}_u}$  of all cells of the discretization grid that intersect the initial set  $\mathcal{X}_u$ . Then, for each cell  $\in \text{Cells}_{\mathcal{X}_u}$ , it uses IA-AI to check if  $\inf_{\mathbf{x} \in \text{cell}} V_{\theta}(\mathbf{x}) \geq \lambda$ .

If the verifier shows that  $V_{\theta}$  satisfies the above checks, it concludes that  $V_{\theta}$  is an additive (and therefore multiplicative) RASM for the system under the policy  $\pi_{\mu}$  and returns the policy together with the lower bound on the probability of satisfying the reach-avoid specification as in Theorem ?? . The fact that the verifier is correct was proved in [61, Theorem 2]. Otherwise, if a counterexample  $\tilde{\mathbf{x}}$  to any of the checks is found, it is added to one of the three counterexample sets  $C_{\text{init}}$ ,  $C_{\text{unsafe}}$  and  $C_{\text{dec}}$  that are then used by the learner to fine-tune  $V_{\theta}$  and  $\pi_{\mu}$ .

**Soundness and computation of  $\gamma$ .** The following theorem establishes that the above is a sound verification procedure and provides a closed-form expression for the values of  $\delta > 0$  and  $\gamma \in (0, 1)$  for which  $V_{\theta}$  is a  $(\gamma, \delta, \lambda)$ -multiplicative RASM. Hence, to compute the lower bound on the probability of satisfying reach-avoidance in Theorem 2, one may use the value of  $\gamma$  implied by the theorem together with  $\lambda$  which is fixed by the algorithm,  $L_V$  which is computed by the algorithm and the maximal step size  $\Delta$  which we assume is provided by the user.

**Theorem 8.** *If the verifier returns neural networks  $\pi_{\mu}$  and  $V_{\theta}$ , then  $V_{\theta}$  is a  $(\gamma, \delta, \lambda)$ -multiplicative RASM with*

$$\delta = \min \left\{ \min_{\tilde{\mathbf{x}} \in \tilde{\mathcal{X}}} \left( V_{\theta}(\tilde{\mathbf{x}}) - \tau \cdot K - \mathbb{E}_{\omega \sim d} [V_{\theta}(f(\tilde{\mathbf{x}}, \pi(\tilde{\mathbf{x}}), \omega))] \right), \lambda \right\}, \quad \gamma = 1 - \frac{\delta}{\lambda}.$$

*Proof.* Since it was shown in [61] that the verifier provides a sound verification procedure for checking that  $V_{\theta}$  is an additive RASM, by the equivalence in Theorem 1 it follows that it is also sound for checking that  $V_{\theta}$  is a  $(\gamma, \delta, \lambda)$ -multiplicative RASM for some values of  $\gamma$  and  $\delta$ . Hence, it remains to show that the values of  $\gamma$  and  $\delta$  in the theorem statement are correct.

First, we show that the Strict positivity outside  $\mathcal{X}_t$  condition is satisfied with the above value of  $\delta$ . To see this, let  $\mathbf{x} \in \mathcal{X} \setminus \mathcal{X}_t$ . Since  $\delta \leq \lambda$ , suppose without loss of generality that  $V_{\theta}(\mathbf{x}) \leq \lambda$ . Then,  $\mathbf{x}$  is contained in a discretization grid cell which contains a non-target state and over which  $V$  attains a value that is  $\leq \lambda$ . Hence, the verifier has shown that  $\mathbb{E}_{\omega \sim d} [V_{\theta}(f(\tilde{\mathbf{x}}, \pi(\tilde{\mathbf{x}}), \omega))] < V_{\theta}(\tilde{\mathbf{x}}) - \tau \cdot K$  holds for each  $\tilde{\mathbf{x}} \in \tilde{\mathcal{X}}$  which is a vertex of this cell. Taking a vertex  $\tilde{\mathbf{x}} \in \tilde{\mathcal{X}}$  of this cell for which  $\|\mathbf{x} - \tilde{\mathbf{x}}\|_1 \leq \tau$ , by the definition of Lipschitz constants we have

$$\begin{aligned} & \mathbb{E}_{\omega \sim d} \left[ V \left( f(\mathbf{x}, \pi(\mathbf{x}), \omega) \right) \right] \\ & \leq \mathbb{E}_{\omega \sim d} \left[ V \left( f(\tilde{\mathbf{x}}, \pi(\tilde{\mathbf{x}}), \omega) \right) \right] + \|f(\tilde{\mathbf{x}}, \pi(\tilde{\mathbf{x}}), \omega) - f(\mathbf{x}, \pi(\mathbf{x}), \omega)\|_1 \cdot L_V \\ & \leq \mathbb{E}_{\omega \sim d} \left[ V \left( f(\tilde{\mathbf{x}}, \pi(\tilde{\mathbf{x}}), \omega) \right) \right] + \|(\tilde{\mathbf{x}}, \pi(\tilde{\mathbf{x}}), \omega) - (\mathbf{x}, \pi(\mathbf{x}), \omega)\|_1 \cdot L_V \cdot L_f \\ & \leq \mathbb{E}_{\omega \sim d} \left[ V \left( f(\tilde{\mathbf{x}}, \pi(\tilde{\mathbf{x}}), \omega) \right) \right] + \|\tilde{\mathbf{x}} - \mathbf{x}\|_1 \cdot L_V \cdot L_f \cdot (1 + L_{\pi}) \\ & \leq \mathbb{E}_{\omega \sim d} \left[ V \left( f(\tilde{\mathbf{x}}, \pi(\tilde{\mathbf{x}}), \omega) \right) \right] + \tau \cdot L_V \cdot L_f \cdot (1 + L_{\pi}). \end{aligned}$$

Hence, by the Nonnegativity condition we also have

$$\begin{aligned}
V(\mathbf{x}) &\geq V(\mathbf{x}) - \mathbb{E}_{\omega \sim d} \left[ V \left( f(\mathbf{x}, \pi(\mathbf{x}), \omega) \right) \right] \\
&\geq V(\tilde{\mathbf{x}}) - \tau \cdot L_V - \mathbb{E}_{\omega \sim d} \left[ V \left( f(\tilde{\mathbf{x}}, \pi(\tilde{\mathbf{x}}), \omega) \right) \right] - \tau \cdot L_V \cdot L_f \cdot (1 + L_\pi) \\
&= V(\tilde{\mathbf{x}}) - \tau \cdot K - \mathbb{E}_{\omega \sim d} \left[ V \left( f(\tilde{\mathbf{x}}, \pi(\tilde{\mathbf{x}}), \omega) \right) \right] \\
&\geq \delta,
\end{aligned} \tag{2}$$

since  $K = L_V \cdot (L_f \cdot (L_\pi + 1) + 1)$ , which concludes the proof.

Second, we show that Multiplicative expected decrease condition with the above value of  $\gamma$  holds.

Let  $\mathbf{x} \in \mathcal{X} \setminus \mathcal{X}_t$  be such that  $V_\theta(\mathbf{x}) \leq \lambda$ . We need to show that  $\gamma \cdot V(\mathbf{x}) \geq \mathbb{E}_{\omega \sim d} [V(f(\mathbf{x}, \pi(\mathbf{x}), \omega))]$ .

Since we showed in eq. (2) that  $V(\mathbf{x}) \geq V(\mathbf{x}) - \mathbb{E}_{\omega \sim d} [V(f(\mathbf{x}, \pi(\mathbf{x}), \omega))] \geq \delta > 0$  and since

$V_\theta(\mathbf{x}) \leq \lambda$ , we have

$$\begin{aligned}
\frac{\mathbb{E}_{\omega \sim d} [V(f(\mathbf{x}, \pi(\mathbf{x}), \omega))]}{V(\mathbf{x})} &= 1 - \frac{V(\mathbf{x}) - \mathbb{E}_{\omega \sim d} [V(f(\mathbf{x}, \pi(\mathbf{x}), \omega))]}{V(\mathbf{x})} \\
&\leq 1 - \frac{\delta}{V(\mathbf{x})} \leq 1 - \frac{\delta}{\lambda}.
\end{aligned}$$

This concludes the proof.  $\square$

### F Proof of Theorem 3

**Theorem 3.** [Proof in Appendix F] Algorithm 1 is compositional, and if it outputs a policy  $\pi$ , then  $\pi$  guarantees the probabilistic specification  $(\phi, p)$ .

*Proof.* In order to prove that  $\pi$  guarantees satisfaction of the probabilistic specification  $(\phi, p)$ , by Theorem 5 it suffices to show that  $\pi$  satisfies abstract reachability for the abstract graph  $G$  with probability at least  $p$ .

To prove abstract reachability for  $G$  with probability at least  $p$ , we show that a random trajectory of the system under policy  $\pi$  satisfies reach-avoid specifications of the edges along the finite path  $s = v_{i_0}, v_{i_1}, \dots, v_{i_k} = t$  exhibited above with probability at least  $p$ . To prove this, we proceed by induction on  $0 \leq j \leq k$  to show that a random trajectory of the system under policy  $\pi$  satisfies reach-avoid specifications of each edge along a prefix  $s = v_{i_0}, v_{i_1}, \dots, v_{i_j}$  of this path with probability at least  $\text{Prob}[v_{i_j}]$ . Recall,  $\text{Prob}$  is the dictionary computed by Algorithm 1. Abstract reachability for  $G$  with probability at least  $p$  then follows if we set  $j = k$ , since  $v_{j_k} = t$  and we must have  $\text{Prob}[t] \geq p$  for Algorithm 1 to output a policy (lines 15-17).

The base case  $j = 0$  follows trivially since the system starts in the initial region  $\beta(s) = \mathcal{X}_0$  and since  $\text{Prob}[v_{i_0}] = \text{Prob}[s] = 1$  by line 6. For the inductive step, suppose that  $0 \leq j \leq k - 1$  and that  $\pi$  satisfies reach-avoid specifications of each edge along  $s = v_{i_0}, v_{i_1}, \dots, v_{i_j}$  with probability at least  $\text{Prob}[v_{i_j}]$ . The claim for the prefix of length  $j + 1$  then follows by our construction of the finite path  $s = v_{i_0}, v_{i_1}, \dots, v_{i_k} = t$ , as it implies that Algorithm 1 has successfully learned an edge policy for the edge  $(v_{i_j}, v_{i_{j+1}})$  that ensures satisfaction of the associated reach-avoid specification with probability at least  $p_{(v_{i_j}, v_{i_{j+1}})}$  and for which  $\text{Prob}[v_{i_{j+1}}] = p_{(v_{i_j}, v_{i_{j+1}})} \cdot \text{Prob}[v_{i_j}]$ . Since the right-hand-side of this equality is a lower bound on the probability of  $\pi$  satisfying reach-avoid specifications of each edge along  $s = v_{i_0}, v_{i_1}, \dots, v_{i_j}$  multiplied by a lower bound on the probability of it satisfying the reach-avoid specification of the edge  $(v_{i_j}, v_{i_{j+1}})$ , the claim follows. This concludes the proof by induction.  $\square$
